# Supplementary material for: Brain-Type Glycogen Phosphorylase Is Crucial for Astrocytic Glycogen Accumulation in Chronic Social Defeat Stress-Induced Depression in Mice
Source: PubMed Central journal article supplement (PMC8820374; doi:10.3389/fnmol.2021.819440), 2022-01-24
Supplement: Image_1.pdf [file Image_1.pdf]

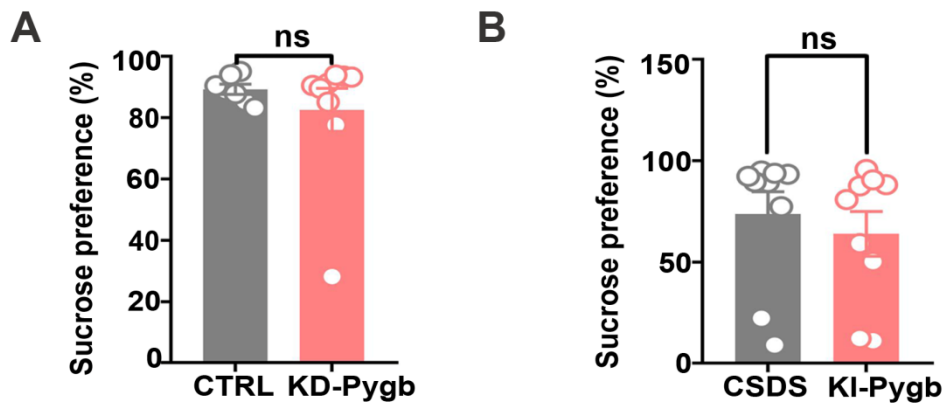

**Supplementary Figure 1: Sucrose preference test in mice with PYGB knockdown or overexpression.** (A) Pygb-knockdown mice models assessed by sucrose preference test (n = 7). (B) Pygb-overexpression mice models assessed by sucrose preference test (n = 9). ns: not significant. CTRL: control mouse models. KD-Pygb: Pygb-knock down mouse models. CSDS: chronic social defeat stress mouse models. KI-Pygb: Pygb-knock in mouse models.

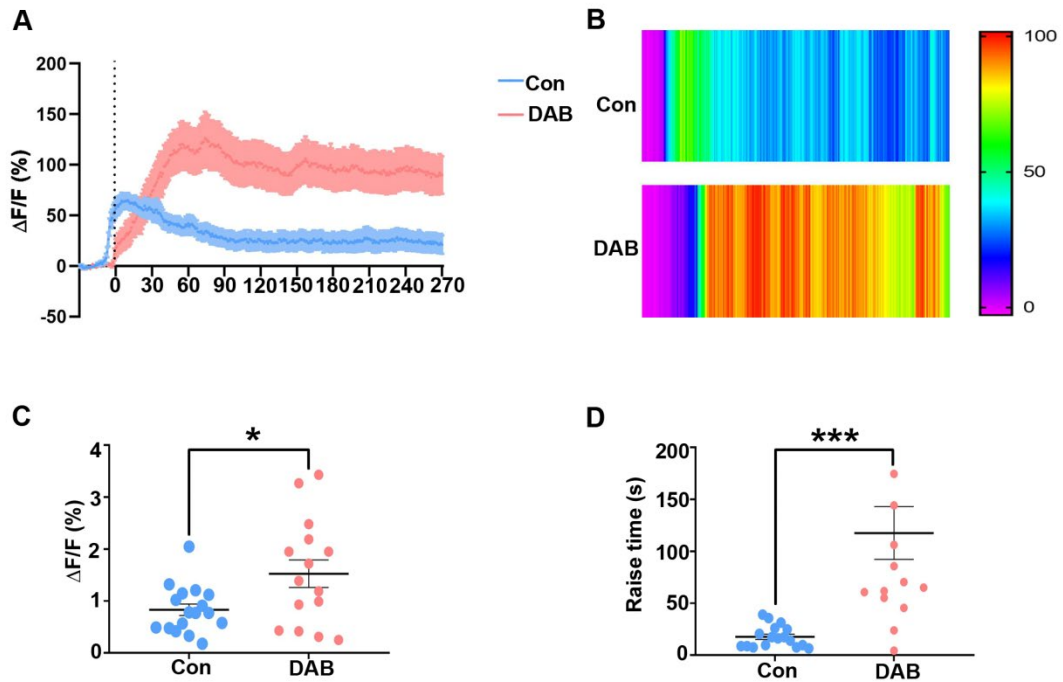

**Supplementary Figure 2: Effects of knocking down Pygb expression on calcium influx.** A calcium-indicator Fluo-8 AM was used to detect the intracellular  $\text{Ca}^{2+}$  oscillations in neurons. The neurons and astrocytes co-culture system was subjected to DAB (300 $\mu\text{M}$ ) for 6 h. Neurons of  $\text{Ca}^{2+}$  imaging obtained with confocal microscopy in Con and DAB treatment group. The amplitude map ( $\Delta F/F$ ) (A), thermal map (B), statistical analysis of amplitude ( $\Delta F/F$ ) (C), and rise time (D) of the intracellular  $\text{Ca}^{2+}$  oscillations after adding ATP in each group. \* $p < 0.05$ , \*\*\* $p < 0.001$ .

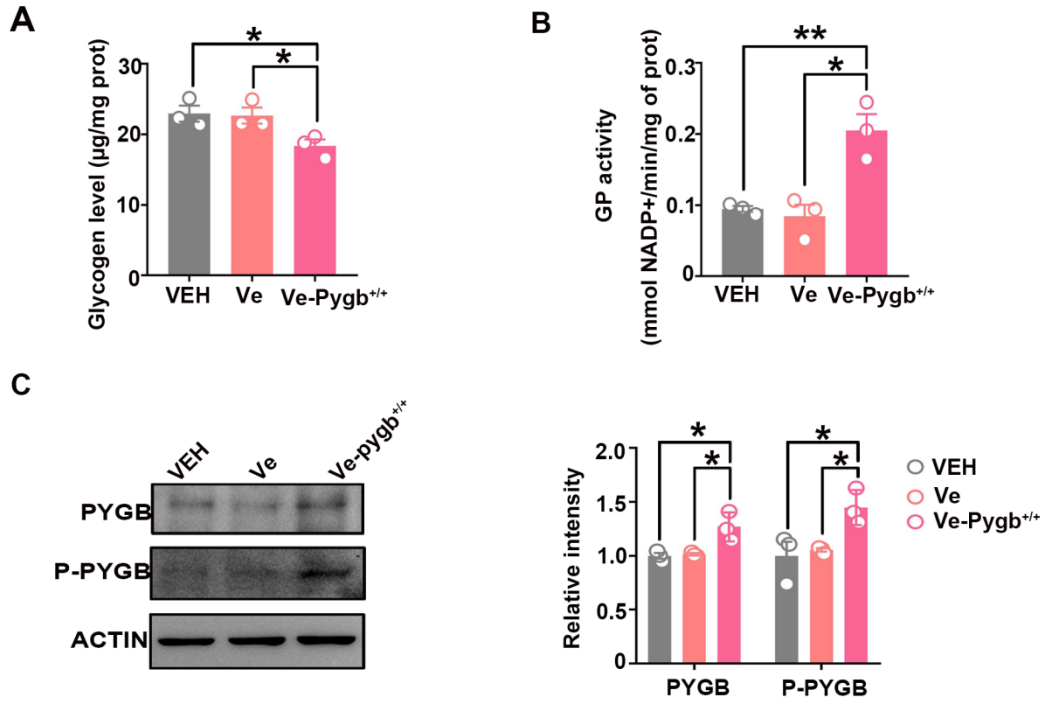

**Supplementary Figure 3: Verification of successful establishment of PYGB overexpression models in cultured astrocytes. (A-B)** Glycogen level and GP activity were analyzed in astrocytic PYGB overexpression models (n = 3). **(C)** PYGB protein levels were determined in astrocytic PYGB overexpression (named Ve-Pygb) models using immunoblotting (n = 3). Statistical significance was evaluated using Student's *t*-test.

\**p* < 0.05, \*\**p* < 0.01. PYGB: glycogen phosphorylase.
